# Supplementary material
Source: publisher figshare collection journal article supplement (https://frontiersin.figshare.com/ndownloader/files/14101523)
Supplement: Supplementary file [file 14101523]

**Table S5.** Gene set enrichment analysis of genes upregulated in CD8+XCR1neg vs. CD8+XCR1+ DC

Gene set enrichment analysis was carried out on genes upregulated with a FC>2 and adj. P-value<0.05 (n=601) using Enrichr to query:

**The Mouse Genome Atlas**

| Term                          | Overlap | Gene Symbols                                                                                                                                                                                                                          | Adjusted P-value |
|-------------------------------|---------|---------------------------------------------------------------------------------------------------------------------------------------------------------------------------------------------------------------------------------------|------------------|
| dendritic_plasmacytoid_B220+  | 36/214  | L3MBTL3;DCLRE1C;LOC73899;CLEC10A;SLA2;SIGLECH;LRP8;XKRX;CCR9;CTSH;KLK1B27;DIRC2;HAVCR1;LAIR1;CD209D;CD209E;LAG3;CD209C;ST8SIA1;SEMA4B;KLRA17;TRAPPC5;CD209A;RUNX2;FGR;EEPD1;CD4;SNX18;CD7;GM5547;TUBGCP5;TLR7;TCF4;RELL1;MCTP2;CLEC4G | 3.65E-11         |
| dendritic_cells_myeloid_CD8a- | 31/188  | SIRPB1A;DOCK4;CLEC4A3;LOC73899;SLCO5A1;MEFV;RELB;REM1;5430437J10RIK;RAP1A;PTCHD1;MARVELD1;CTSH;ST8SIA6;CD209E;CD209C;ST8SIA1;IL1R1;TRAPPC5;ABCA9;EMR4;CD209A;FGR;CCDC88A;CYP4F16;TBC1D4;AEBP2;GPR183;CD7;TLR5;BEX6                    | 5.73E-07         |
| lymph_nodes                   | 15/90   | ITK;TCF7;GIMAP3;TIMD4;TMEM173;SIGLECH;CD3D;CMAH;SLC4A8;CD4;TBC1D4;ABI3;IL2RB;FSCN1;NUDT17                                                                                                                                             | 2.53E-03         |

**KEGG Pathways 2016**

| Term                                                      | Overlap | Gene Symbols                                                                                                                                                           | Adjusted P-value |
|-----------------------------------------------------------|---------|------------------------------------------------------------------------------------------------------------------------------------------------------------------------|------------------|
| Hematopoietic cell lineage                                | 18/88   | CSF1R;ITGAM;TFRC;IL1R1;IL1R2;DNTT;CD3G;CD3E;CD3D;CD2;CD4;CD5;IL2RA;CD7;CD14;IL7R;IL9R;CD33                                                                             | 2.29E-08         |
| Cytokine-cytokine receptor interaction                    | 27/265  | CX3CR1;CSF1R;CXCL1;TNFRSF11A;IL2RG;CXCL2;IL21R;KDR;CCR9;CCR7;CCL17;IL1R1;IL1R2;TNFRSF9;TNFRSF18;LIFR;TNFRSF1B;ACVR2A;IL17RA;IL2RA;IL2RB;TNFSF9;FAS;LTB;IL6ST;IL7R;IL9R | 2.50E-06         |
| NF-kappa B signaling pathway                              | 16/93   | TICAM2;GADD45B;IL1R1;DDX58;PRKCB;TNFAIP3;TNFRSF11A;PTGS2;CXCL2;MALT1;RELB;LCK;BLNK;LTB;CD14;LAT                                                                        | 1.75E-06         |
| Primary immunodeficiency                                  | 9/37    | CD4;DCLRE1C;LCK;AIRE;BLNK;IL7R;IL2RG;CD3E;CD3D                                                                                                                         | 5.96E-05         |
| Measles                                                   | 16/136  | STAT5A;DDX58;TNFAIP3;PIK3R3;CD3G;IL2RG;CD3E;CD3D;CCND2;OAS2;IL2RA;IL2RB;CD28;FAS;TLR7;FYN                                                                              | 1.46E-04         |
| Lysosome_Homo sapiens                                     | 15/123  | CTSA;CD164;CD63;SORT1;GAA;CTSW;LAMP1;NPC1;CTSL;ACP5;CTSH;TPP1;CTSD;CTSC;LGMN                                                                                           | 1.56E-04         |
| T cell receptor signaling pathway                         | 13/104  | ITK;PIK3R3;CD3G;CD3E;RASGRP1;CD3D;MALT1;CD4;TEC;LCK;CD28;FYN;LAT                                                                                                       | 4.41E-04         |
| Osteoclast differentiation                                | 14/132  | CSF1R;IL1R1;NCF2;CYBB;PIK3R3;TNFRSF11A;LILRB4;RELB;TEC;LCK;BLNK;SIRPA;ACP5;FYN                                                                                         | 1.20E-03         |
| Cell adhesion molecules (CAMs)                            | 14/142  | CD274;CADM3;ITGAM;SDC4;PDCD1LG2;L1CAM;PTPRF;CD2;SPN;CD4;SELL;CDH1;PECAM1;CD28                                                                                          | 2.37E-03         |
| Choline metabolism in cancer                              | 11/101  | SLC44A5;PLA2G4F;DGKD;PCYT1A;CHKA;PRKCB;SLC44A2;RAC2;PIK3R3;PRKCA;GPCPD1                                                                                                | 4.49E-03         |
| Leukocyte transendothelial migration                      | 12/118  | ITK;RAP1A;ITGAM;PRKCB;NCF2;PECAM1;CTNNA1;RAC2;CYBB;PIK3R3;PRKCA;THY1                                                                                                   | 4.49E-03         |
| Chemokine signaling pathway                               | 15/187  | CX3CR1;ITK;PRKCB;PIK3R3;CXCL1;RASGRP2;CXCL2;ADCY6;FGR;GNGT2;RAP1A;CCR9;RAC2;CCR7;CCL17                                                                                 | 9.08E-03         |
| Endocrine and other factor-regulated calcium reabsorption | 9/37    | KLK1;PRKCB;FXD2;ATP1A3;PRKCA;ATP1B1;ADCY6                                                                                                                              | 8.51E-03         |

**GO Biological Processes**

| Term                                                     | Overlap | Gene Symbols                                                                                                                                                                                                                                                               | Adjusted P-value |
|----------------------------------------------------------|---------|----------------------------------------------------------------------------------------------------------------------------------------------------------------------------------------------------------------------------------------------------------------------------|------------------|
| regulation of cell activation (GO:0050865)               | 47/420  | CD274;PGLYRP2;TRAC;TNFAIP3;CD3G;THY1;PRDM1;CD3E;SLA2;CD3D;SAMS1;MALT1;SPN;IL1RL2;LGALS1;TESPA1;LAMP1;HLX;TRBC1;CLPTM1;CCR7;FYN;STAT5A;PRNP;MEF2C;LAG3;FCER1G;CD300A;IL31RA;PRKCA;PDCD1LG2;CD2;FGR;CD4;TEC;ADORA2A;LCK;CD5;IRF4;GPR183;IL2RA;CD28;FAS;TNFSF9;IL6ST;IL7R;LAT | 1.16E-11         |
| regulation of leukocyte activation (GO:0002694)          | 45/390  | CD274;PGLYRP2;TRAC;TNFAIP3;CD3G;THY1;PRDM1;CD3E;SLA2;CD3D;SAMS1;MALT1;SPN;IL1RL2;LGALS1;LAMP1;TESPA1;HLX;TRBC1;CLPTM1;CCR7;FYN;STAT5A;PRNP;MEF2C;LAG3;FCER1G;CD300A;IL31RA;PDCD1LG2;CD2;FGR;CD4;ADORA2A;LCK;CD5;IRF4;GPR183;IL2RA;CD28;FAS;TNFSF9;IL6ST;IL7R;LAT           | 1.16E-11         |
| regulation of lymphocyte activation (GO:0051249)         | 42/344  | CD274;PGLYRP2;TRAC;TNFAIP3;CD3G;THY1;PRDM1;CD3E;SLA2;SAMS1;CD3D;MALT1;SPN;IL1RL2;LGALS1;TESPA1;LAMP1;HLX;TRBC1;CLPTM1;FYN;CCR7;STAT5A;PRNP;MEF2C;LAG3;CD300A;PDCD1LG2;CD2;CD4;ADORA2A;IRF4;LCK;CD5;GPR183;IL2RA;CD28;FAS;TNFSF9;IL6ST;IL7R;LAT                             | 1.16E-11         |
| leukocyte activation (GO:0045321)                        | 43/373  | PTGER4;CX3CR1;ITK;ITGAM;DCLRE1C;SATB1;LEF1;TCF7;CD3G;CD3E;SLA2;RASGRP1;CLU;CD3D;MALT1;RELB;LGALS1;CLEC7A;IL21R;BLNK;FYN;SOX4;STAT5A;MEF2C;FCER1G;PRKCB;ANXA3;RUNX2;FOXP1;BST2;CD2;CD4;IRF4;LCK;GPR183;CD7;BCL3;LY6D;CD28;TNFSF9;TLR7;IL7R;LAT                              | 3.21E-11         |
| lymphocyte activation (GO:0046649)                       | 36/304  | PTGER4;ITK;ITGAM;DCLRE1C;SATB1;LEF1;TCF7;CD3G;CD3E;SLA2;CD3D;MALT1;RELB;LGALS1;CLEC7A;IL21R;BLNK;FYN;SOX4;STAT5A;MEF2C;PRKCB;RUNX2;FOXP1;BST2;CD2;CD4;LCK;IRF4;GPR183;CD7;BCL3;LY6D;CD28;IL7R;LAT                                                                          | 1.45E-09         |
| regulation of T cell activation (GO:0050863)             | 32/259  | CD274;TRAC;CD3G;THY1;CD3E;CD3D;MALT1;SPN;IL1RL2;LGALS1;TESPA1;HLX;TRBC1;CLPTM1;FYN;STAT5A;PRNP;PDCD1LG2;CD2;CD4;ADORA2A;LCK;CD5;IRF4;IL2RA;CD28;TNFSF9;IL6ST;IL7R;LAT                                                                                                      | 6.64E-09         |
| positive regulation of leukocyte activation (GO:0002696) | 32/262  | CD274;TRAC;CD3G;THY1;PRDM1;CD3E;CD3D;MALT1;SPN;IL1RL2;LGALS1;TESPA1;LAMP1;HLX;TRBC1;CCR7;FYN;STAT5A;MEF2C;FCER1G;PDCD1LG2;CD2;FGR;CD4;LCK;CD5;GPR183;IL2RA;CD28;TNFSF9;IL6ST;IL7R                                                                                          | 7.74E-09         |
| positive regulation of cell activation (GO:0050867)      | 32/272  | CD274;TRAC;CD3G;THY1;PRDM1;CD3E;CD3D;MALT1;SPN;IL1RL2;LGALS1;TESPA1;LAMP1;HLX;TRBC1;CCR7;FYN;STAT5A;MEF2C;FCER1G;PDCD1LG2;CD2;FGR;CD4;LCK;CD5;GPR183;IL2RA;CD28;TNFSF9;IL6ST;IL7R                                                                                          | 1.62E-08         |
| leukocyte differentiation (GO:0002521)                   | 31/251  | PTGER4;CSF1R;ITK;L3MBTL3;DCLRE1C;TFRC;SATB1;LEF1;TCF7;TNFRSF11A;CD3D;MALT1;RELB;LGALS1;BLNK;CCR7;SOX4;STAT5A;MEF2C;IL31RA;RUNX2;FOXP1;CD4;LCK;IRF4;GPR183;BCL3;LY6D;CD28;TNFSF9;IL7R                                                                                       | 1.06E-08         |

|                                                                                 |        |                                                                                                                                                                                                                                                    |          |
|---------------------------------------------------------------------------------|--------|----------------------------------------------------------------------------------------------------------------------------------------------------------------------------------------------------------------------------------------------------|----------|
| regulation of cytokine production (GO:0001817)                                  | 43/482 | PTGER4;CD274;CSF1R;PGLYRP2;LEF1;TNFAIP3;CD3E;PTGS2;MEFV;CLU;MALT1;SPN;PANX1;IL1RL2;ACP5;APOD;CCR7;CD14;STAT5A;PRNP;LAG3;TICAM2;FCER1G;DDX58;IRAK3;KLF4;TMEM173;SULF2;IL17RA;BST2;FGR;CD2;CD4;IRF4;BCL3;CD28;TNFSF9;TLR7;TLTB;HPSE;ACKR1;IL6ST;TLR5 | 6.68E-08 |
| immune response-activating signal transduction (GO:0002757)                     | 36/440 | ITK;PGLYRP2;ITGAM;TRAC;TNFAIP3;CD3G;THY1;CD3E;SLA2;CD3D;MALT1;CD79B;IGKC;CTSL;CLEC7A;TRBC1;FYN;CD14;MEF2C;FCER1G;TICAM2;DDX58;PRKCB;RFTN1;IRAK3;FGR;CD4;CACNB3;TEC;LCK;TNIP3;CD28;TLR7;TLR5;LAT;LGMN                                               | 9.18E-06 |
| positive regulation of lymphocyte activation (GO:0051251)                       | 29/243 | CD274;TRAC;CD3G;THY1;PRDM1;CD3E;CD3D;MALT1;SPN;IL1RL2;LGALS1;TESPA1;LAMP1;HLX;TRBC1;CCR7;FYN;STAT5A;MEF2C;PDCD1LG2;CD4;LCK;CD5;GPR183;IL2RA;CD28;TNFSF9;IL6ST;IL7R                                                                                 | 7.39E-08 |
| activation of immune response (GO:0002253)                                      | 38/487 | ITK;ITGAM;PGLYRP2;TRAC;TNFAIP3;CD3G;THY1;CD3E;SLA2;CD3D;CLU;MALT1;CD79B;IGKC;CTSL;CLEC7A;TRBC1;FYN;CD14;MEF2C;TICAM2;FCER1G;DDX58;PRKCB;RFTN1;IRAK3;TMEM173;FGR;CD4;CACNB3;TEC;LCK;TNIP3;CD28;TLR7;TLR5;LAT;LGMN                                   | 1.22E-05 |
| T cell activation (GO:0042110)                                                  | 26/198 | PTGER4;ITK;ITGAM;SATB1;LEF1;TCF7;CD3G;CD3E;SLA2;CD3D;MALT1;RELB;CLEC7A;FYN;SOX4;STAT5A;RUNX2;CD2;CD4;LCK;IRF4;CD7;BCL3;CD28;IL7R;LAT                                                                                                               | 7.39E-08 |
| positive regulation of defense response (GO:0031349)                            | 30/272 | PTGER4;ITGAM;PGLYRP2;TNFAIP3;TNFRSF11A;DDX60;PTGS2;LAMP1;CLEC7A;CTSL;CCR7;CD14;STAT5A;MEF2C;LAG3;FCER1G;TICAM2;DDX58;RFTN1;IRAK3;PRKCA;TMEM173;IL17RA;FABP4;TNIP3;CD28;TLR7;IL6ST;TLR5;LGMN                                                        | 2.20E-07 |
| antigen receptor-mediated signaling pathway (GO:0050851)                        | 20/127 | ITK;MEF2C;PRKCB;TRAC;RFTN1;CD3G;THY1;CD3E;SLA2;CD3D;MALT1;CD79B;CD4;CACNB3;TEC;LCK;TRBC1;CD28;FYN;LAT                                                                                                                                              | 2.95E-07 |
| positive regulation of T cell activation (GO:0050870)                           | 24/189 | STAT5A;CD274;TRAC;CD3G;THY1;PDCD1LG2;CD3E;CD3D;MALT1;SPN;IL1RL2;CD4;LGALS1;TESPA1;HLX;LCK;CD5;IL2RA;TRBC1;CD28;TNFSF9;FYN;IL6ST;IL7R                                                                                                               | 5.69E-07 |
| positive regulation of cytokine production (GO:0001819)                         | 31/327 | PTGER4;CD274;CSF1R;CD3E;PTGS2;CLU;MALT1;SPN;PANX1;IL1RL2;CCR7;CD14;STAT5A;TICAM2;FCER1G;DDX58;TMEM173;SULF2;IL17RA;CD2;FGR;CD4;IRF4;BCL3;CD28;TNFSF9;TLR7;TLTB;HPSE;IL6ST;TLR5                                                                     | 3.20E-06 |
| cytokine-mediated signaling pathway (GO:0019221)                                | 32/342 | IFITM3;CX3CR1;CSF1R;IFITM1;EIF4E3;IFITM2;PTAFR;TNFRSF11A;IL2RG;LRP8;IL1RL2;STAT4;IL21R;CCR9;CCR7;STAT5A;IL1R1;IL1R2;TNFRSF18;IL31RA;LIFR;IRAK3;TNFRSF1B;IL17RA;OAS2;IRF4;IL2RA;IL2RB;ACKR1;IL6ST;IL7R;IL9R                                         | 2.73E-06 |
| lymphocyte differentiation (GO:0030098)                                         | 22/172 | STAT5A;PTGER4;ITK;DCLRE1C;SATB1;TCF7;LEF1;CD3D;RUNX2;MALT1;RELB;FOXP1;CD4;LGALS1;LCK;GPR183;BCL3;CD28;LY6D;BLNK;IL7R;SOX4                                                                                                                          | 2.14E-06 |
| negative regulation of immune system process (GO:0002683)                       | 29/311 | PTGER4;CD274;PGLYRP2;TNFAIP3;THY1;PRDM1;SLA2;SAMS1;SPN;HLX;APOD;STAT5A;PRNP;LAG3;TICAM2;FCER1G;CD300A;TMEM176B;TMEM176A;IL31RA;IRAK3;PDCD1LG2;IL1RB4;BST2;ADORA2A;IRF4;IL2RA;FAS;IL7R                                                              | 1.08E-05 |
| regulation of inflammatory response (GO:0050727)                                | 25/247 | PTGER4;PGLYRP2;PROS1;TNFAIP3;TNFRSF11A;PTGS2;MEFV;SPN;IL1RL2;ACP5;APOD;CCR7;STAT5A;FCER1G;IL1R1;PRKCA;TNFRSF1B;KLF4;IL17RA;FABP4;ADORA2A;IL2RA;CD28;TLR7;IL6ST                                                                                     | 1.65E-05 |
| T cell costimulation (GO:0031295)                                               | 14/76  | CD274;TRAC;CD3G;PDCD1LG2;CD3E;CD3D;SPN;CD4;LGALS1;CD5;LCK;TRBC1;CD28;FYN                                                                                                                                                                           | 8.53E-06 |
| lymphocyte costimulation (GO:0031294)                                           | 14/77  | CD274;TRAC;CD3G;PDCD1LG2;CD3E;CD3D;SPN;CD4;LGALS1;CD5;LCK;TRBC1;CD28;FYN                                                                                                                                                                           | 9.18E-06 |
| cellular response to cytokine stimulus (GO:0071345)                             | 36/471 | IFITM3;CX3CR1;CSF1R;IFITM1;EIF4E3;IFITM2;NPR2;LEF1;TCF7;PTAFR;TNFRSF11A;IL2RG;LRP8;IL1RL2;IL21R;STAT4;CCR9;CCR7;STAT5A;IL1R1;TNFRSF18;IL1R2;IL31RA;LIFR;IRAK3;TMEM173;TNFRSF1B;IL17RA;IRF4;OAS2;IL2RA;IL2RB;ACKR1;IL6ST;IL7R;IL9R                  | 3.63E-05 |
| regulation of immune effector process (GO:0002697)                              | 25/264 | PGLYRP2;PROS1;TNFAIP3;DDX60;MALT1;SPN;LAMP1;HLX;FYN;STAT5A;LAG3;FCER1G;DDX58;CD300A;IRAK3;TMEM173;FOXP1;BST2;FGR;CD4;LCK;IRF4;IL2RA;CD28;IL7R                                                                                                      | 4.69E-05 |
| T cell differentiation (GO:0030217)                                             | 15/97  | STAT5A;PTGER4;ITK;SATB1;LEF1;TCF7;CD3D;RUNX2;RELB;CD4;LCK;BCL3;CD28;IL7R;SOX4                                                                                                                                                                      | 2.36E-05 |
| T cell receptor signaling pathway (GO:0050852)                                  | 15/99  | ITK;TRAC;RFTN1;CD3G;THY1;CD3E;CD3D;MALT1;CD4;CACNB3;LCK;TRBC1;CD28;FYN;LAT                                                                                                                                                                         | 2.99E-05 |
| negative regulation of lymphocyte activation (GO:0051250)                       | 15/102 | PRNP;CD274;LAG3;PGLYRP2;CD300A;TNFAIP3;PRDM1;PDCD1LG2;SLA2;SAMS1;SPN;ADORA2A;HLX;IL2RA;FAS                                                                                                                                                         | 4.14E-05 |
| cellular response to interleukin-15 (GO:0071350)                                | 6/10   | IL2RA;IL2RB;IL21R;IL7R;IL2RG;IL9R                                                                                                                                                                                                                  | 1.70E-05 |
| response to interleukin-15 (GO:0070672)                                         | 6/13   | IL2RA;IL2RB;IL21R;IL7R;IL2RG;IL9R                                                                                                                                                                                                                  | 1.00E-04 |
| negative regulation of leukocyte activation (GO:0002695)                        | 16/120 | PRNP;CD274;LAG3;PGLYRP2;CD300A;IL31RA;TNFAIP3;PRDM1;PDCD1LG2;SLA2;SAMS1;SPN;ADORA2A;HLX;IL2RA;FAS                                                                                                                                                  | 6.27E-05 |
| regulation of response to wounding (GO:1903034)                                 | 28/347 | PTGER4;PGLYRP2;PROS1;TNFAIP3;TNFRSF11A;PTGS2;MEFV;SPN;IL1RL2;ACP5;APOD;CCR7;STAT5A;FCER1G;IL1R1;PLAUR;PRKCA;TNFRSF1B;KLF4;IL17RA;FABP4;TEC;ADORA2A;IL2RA;CD28;TLR7;HPSE;IL6ST                                                                      | 2.23E-04 |
| blood coagulation (GO:0007596)                                                  | 34/472 | CD63;ITGAM;DGKD;PROS1;SLC7A11;RASGRP2;LRRC16A;RASGRP1;CLU;LRP8;FBLN5;PHF21A;PAPSS2;SPN;RAP1A;RAC2;SIRPA;FYN;P2RY12;FCER1G;PRKCB;PLAUR;ATP2B4;PRKCA;L1CAM;ATP1B1;FGR;CD2;ADORA2A;SELL;LCK;PECAM1;LAT;CD244                                          | 2.33E-04 |
| coagulation (GO:0050817)                                                        | 34/472 | CD63;ITGAM;DGKD;PROS1;SLC7A11;LRRC16A;RASGRP2;RASGRP1;LRP8;CLU;FBLN5;PHF21A;PAPSS2;SPN;RAP1A;RAC2;SIRPA;FYN;P2RY12;FCER1G;PRKCB;PLAUR;ATP2B4;PRKCA;L1CAM;ATP1B1;FGR;CD2;ADORA2A;SELL;LCK;PECAM1;LAT;CD244                                          | 2.33E-04 |
| hemostasis (GO:0007599)                                                         | 34/478 | CD63;ITGAM;DGKD;PROS1;SLC7A11;RASGRP2;LRRC16A;RASGRP1;CLU;LRP8;FBLN5;PHF21A;PAPSS2;SPN;RAP1A;RAC2;SIRPA;FYN;P2RY12;FCER1G;PRKCB;PLAUR;ATP2B4;PRKCA;L1CAM;ATP1B1;FGR;CD2;ADORA2A;SELL;LCK;PECAM1;LAT;CD244                                          | 2.91E-04 |
| negative regulation of cell activation (GO:0050866)                             | 16/135 | PRNP;CD274;LAG3;PGLYRP2;CD300A;IL31RA;TNFAIP3;PRDM1;PDCD1LG2;SLA2;SAMS1;SPN;ADORA2A;HLX;IL2RA;FAS                                                                                                                                                  | 2.65E-04 |
| immune response-activating cell surface receptor signaling pathway (GO:0002429) | 23/324 | ITK;MEF2C;FCER1G;PRKCB;TRAC;RFTN1;CD3G;THY1;CD3E;SLA2;CD3D;MALT1;FGR;CD79B;CD4;CACNB3;TEC;IGKC;LCK;TRBC1;CD28;FYN;LAT                                                                                                                              | 6.23E-03 |

|                                                                        |        |                                                                                                                                                                                     |          |
|------------------------------------------------------------------------|--------|-------------------------------------------------------------------------------------------------------------------------------------------------------------------------------------|----------|
| positive regulation of innate immune response (GO:0045089)             | 19/190 | STAT5A;MEF2C;LAG3;ITGAM;PGLYRP2;TICAM2;DDX58;RFTN1;TNFAIP3;IRAK3;TMEM173;LAMP1;CLEC7A;CTSL;TNIP3;TLR7;CD14;TLR5;LGMN                                                                | 3.99E-04 |
| regulation of interleukin-2 biosynthetic process (GO:0045076)          | 6/19   | STAT5A;LAG3;CD4;IRF4;CD28;CD3E                                                                                                                                                      | 9.66E-04 |
| regulation of interleukin-2 production (GO:0032663)                    | 9/45   | STAT5A;PRNP;LAG3;CD4;IRF4;CD28;TNFAIP3;CD3E;MALT1                                                                                                                                   | 4.99E-04 |
| regulation of T cell receptor signaling pathway (GO:0050856)           | 7/25   | PRNP;TESPA1;LCK;CD300A;CCR7;THY1;MALT1                                                                                                                                              | 4.99E-04 |
| regulation of antigen receptor-mediated signaling pathway (GO:0050854) | 8/35   | PRNP;TESPA1;PRKCB;LCK;CD300A;CCR7;THY1;MALT1                                                                                                                                        | 5.54E-04 |
| T cell selection (GO:0045058)                                          | 7/27   | SPN;CD4;CD28;FAS;CCR7;CD3E;CD3D                                                                                                                                                     | 8.34E-04 |
| thymic T cell selection (GO:0045061)                                   | 6/20   | SPN;CD28;FAS;CCR7;CD3E;CD3D                                                                                                                                                         | 1.24E-03 |
| positive regulation of inflammatory response (GO:0050729)              | 12/88  | PTGER4;STAT5A;FCER1G;FABP4;CD28;TLR7;CCR7;PRKCA;TNFRSF11A;PTGS2;IL6ST;IL17RA                                                                                                        | 9.01E-04 |
| activation of innate immune response (GO:0002218)                      | 16/151 | MEF2C;ITGAM;TICAM2;PGLYRP2;DDX58;RFTN1;TNFAIP3;IRAK3;TMEM173;CTSL;CLEC7A;TNIP3;TLR7;CD14;TLR5;LGMN                                                                                  | 9.24E-04 |
| regulation of leukocyte differentiation (GO:1902105)                   | 19/210 | STAT5A;PGLYRP2;TMEM176B;TMEM176A;LEF1;PRKCA;PRDM1;LILRB4;CD2;IL1RL2;TESPA1;IRF4;LCK;HLX;IL2RA;CLPTM1;TNFSF9;FAS;IL7R                                                                | 1.28E-03 |
| positive regulation of interleukin-2 biosynthetic process (GO:0045086) | 5/13   | STAT5A;CD4;IRF4;CD28;CD3E                                                                                                                                                           | 1.46E-03 |
| leukocyte migration (GO:0050900)                                       | 20/226 | CX3CR1;ITGAM;FCER1G;PROS1;PTPRO;PRKCA;TNFRSF11A;SLC7A11;L1CAM;ATP1B1;SPN;CD2;SELL;LCK;PECAM1;S1PR1;SIRPA;CCR7;FYN;CD244                                                             | 1.15E-03 |
| regulation of response to biotic stimulus (GO:0002831)                 | 13/107 | DDX58;LY86;TNFAIP3;PRKCA;PRDM1;TMEM173;DDX60;SPN;CD4;LCK;IL2RA;CD28;FYN                                                                                                             | 1.24E-03 |
| pattern recognition receptor signaling pathway (GO:0002221)            | 15/142 | MEF2C;ITGAM;TICAM2;PGLYRP2;DDX58;RFTN1;TNFAIP3;IRAK3;CTSL;CLEC7A;TNIP3;TLR7;CD14;TLR5;LGMN                                                                                          | 1.46E-03 |
| regulation of lymphocyte differentiation (GO:0045619)                  | 14/124 | STAT5A;PGLYRP2;PRDM1;CD2;IL1RL2;TESPA1;HLX;LCK;IRF4;IL2RA;CLPTM1;TNFSF9;FAS;IL7R                                                                                                    | 1.34E-03 |
| positive regulation of response to external stimulus (GO:0032103)      | 18/201 | PTGER4;STAT5A;FCER1G;DSCAM;LY86;PRKCA;TNFRSF11A;PTGS2;DDX60;IL17RA;FABP4;CD28;S1PR1;KDR;RAC2;TLR7;CCR7;IL6ST                                                                        | 2.14E-03 |
| negative thymic T cell selection (GO:0045060)                          | 5/12   | SPN;CD28;FAS;CCR7;CD3E                                                                                                                                                              | 1.09E-03 |
| innate immune response-activating signal transduction (GO:0002758)     | 15/144 | MEF2C;ITGAM;TICAM2;PGLYRP2;DDX58;RFTN1;TNFAIP3;IRAK3;CTSL;CLEC7A;TNIP3;TLR7;CD14;TLR5;LGMN                                                                                          | 1.68E-03 |
| negative T cell selection (GO:0043383)                                 | 5/13   | SPN;CD28;FAS;CCR7;CD3E                                                                                                                                                              | 1.46E-03 |
| negative regulation of locomotion (GO:0040013)                         | 18/204 | PTGER4;IFITM3;CX3CR1;IFITM1;IFITM2;LRP1;CD300A;SEMA6D;PTPRO;THY1;KLF4;PODN;SMAD7;BST2;RAP2B;ADORA2A;CTNNA1;APOD                                                                     | 2.56E-03 |
| defense response to other organism (GO:0098542)                        | 24/328 | APOBEC1;IFITM3;IFITM1;PGLYRP2;IFITM2;FCER1G;MMP7;ANXA3;DDX60;TMEM173;SPN;BST2;PLAC8;FGR;CD4;CLEC7A;OAS2;IRF4;BCL3;DDIT4;ACP5;TLR7;TLR5;HIST1H2BC                                    | 3.18E-03 |
| alpha-beta T cell differentiation (GO:0046632)                         | 7/34   | PTGER4;ITK;SATB1;TCF7;LEF1;BCL3;RELB                                                                                                                                                | 3.05E-03 |
| response to other organism (GO:0051707)                                | 30/462 | IFITM3;IFITM1;PGLYRP2;IFITM2;DDX60;CLU;MALT1;SPN;PLAC8;CLEC7A;ACP5;HAVCR1;APOBEC1;MEF2C;FCER1G;MMP7;ANXA3;DDX58;IRAK3;TMEM173;BST2;FGR;CD4;IRF4;OAS2;DDIT4;BCL3;TLR7;TLR5;HIST1H2BC | 3.61E-03 |
| regulation of cell adhesion (GO:0030155)                               | 24/336 | DDR1;STAT5A;CD164;DSCAM;SDC4;LEF1;PTPRO;NDNF;PRKCA;LRRC16A;L1CAM;KLF4;SMAD7;SPN;NUAK1;DAB2;LGALS1;CDH1;KDR;S1PR1;RAC2;APOD;CCR7;GPM6B                                               | 4.33E-03 |
| inflammatory response (GO:0006954)                                     | 26/376 | CSF1R;PTAFR;TNFAIP3;CXCL1;PTGS2;MEFV;CXCL2;RASGRP1;NDST1;MMP25;CLEC7A;BLNK;CCR7;CD14;CCL17;TICAM2;LY86;CYBB;TNFRSF1B;ADORA2A;IL2RA;TNIP3;TLR7;ACKR1;TLR5;LAT                        | 3.88E-03 |
| regulation of innate immune response (GO:0045088)                      | 20/254 | STAT5A;MEF2C;LAG3;ITGAM;PGLYRP2;TICAM2;DDX58;RFTN1;TNFAIP3;IRAK3;TMEM173;FGR;LAMP1;CTSL;CLEC7A;TNIP3;TLR7;CD14;TLR5;LGMN                                                            | 4.40E-03 |
| positive regulation of cytokine biosynthetic process (GO:0042108)      | 9/59   | SPN;STAT5A;CD4;IRF4;BCL3;CD28;TLR7;LTB;CD3E                                                                                                                                         | 3.21E-03 |

|                                                               |        |                                                                                                                        |          |
|---------------------------------------------------------------|--------|------------------------------------------------------------------------------------------------------------------------|----------|
| regulation of cytokine biosynthetic process (GO:0042035)      | 11/93  | SPN;STAT5A;LAG3;CD4;IRF4;BCL3;CD28;TLR7;LTB;CD3E;KLF4                                                                  | 5.09E-03 |
| response to molecule of bacterial origin (GO:0002237)         | 19/243 | PTGER4;CX3CR1;MEF2C;TICAM2;NCF2;PTAFR;TNFAIP3;IRAK3;ADM;TNFRSF11A;TNFRSF1B;PTGS2;CXCL2;MALT1;TNIP3;ACP5;CCR7;CD14;TLR5 | 6.33E-03 |
| taxis (GO:0042330)                                            | 20/263 | CX3CR1;DOCK4;NRP2;ITGAM;FCER1G;LEF1;PTAFR;PTPRO;PLAUR;CXCL1;PRKCA;TNFRSF11A;L1CAM;CXCL2;SPN;CCR9;S1PR1;RAC2;CCR7;CCL17 | 6.33E-03 |
| chemotaxis (GO:0006935)                                       | 20/263 | CX3CR1;DOCK4;NRP2;ITGAM;FCER1G;LEF1;PTAFR;PTPRO;PLAUR;CXCL1;PRKCA;TNFRSF11A;L1CAM;CXCL2;SPN;CCR9;S1PR1;RAC2;CCR7;CCL17 | 6.33E-03 |
| positive regulation of interleukin-2 production (GO:0032743)  | 6/29   | STAT5A;CD4;IRF4;CD28;CD3E;MALT1                                                                                        | 7.36E-03 |
| negative regulation of B cell activation (GO:0050869)         | 6/29   | CD300A;FAS;TNFAIP3;PRDM1;SLA2;SAMS1                                                                                    | 7.36E-03 |
| regulation of defense response to virus (GO:0050688)          | 10/77  | SPN;CD4;DDX58;LCK;IL2RA;CD28;TNFAIP3;FYN;TMEM173;DDX60                                                                 | 4.79E-03 |
| positive regulation of response to wounding (GO:1903036)      | 13/130 | PTGER4;STAT5A;FCER1G;PRKCA;TNFRSF11A;PTGS2;IL17RA;FABP4;CD28;TLR7;CCR7;HPSE;IL6ST                                      | 6.33E-03 |
| alpha-beta T cell activation (GO:0046631)                     | 7/40   | PTGER4;ITK;SATB1;TCF7;LEF1;BCL3;RELB                                                                                   | 6.80E-03 |
| platelet activation (GO:0030168)                              | 17/205 | P2RY12;CD63;FCER1G;DGKD;PRKCB;PROS1;PRKCA;RASGRP2;RASGRP1;CLU;RAP1A;RAP2B;LCK;PECAM1;RAC2;FYN;LAT                      | 6.61E-03 |
| leukocyte activation involved in immune response (GO:0002366) | 12/112 | PTGER4;CX3CR1;FCER1G;LGALS1;ANXA3;GPR183;LEF1;BCL3;TLR7;RASGRP1;LAT;RELB                                               | 6.28E-03 |
| cell activation involved in immune response (GO:0002263)      | 12/112 | PTGER4;CX3CR1;FCER1G;LGALS1;ANXA3;GPR183;LEF1;BCL3;TLR7;RASGRP1;LAT;RELB                                               | 6.28E-03 |
| response to interferon-beta (GO:0035456)                      | 5/18   | IFITM3;BST2;IFITM1;IFITM2;TMEM173                                                                                      | 6.33E-03 |
| regulation of T cell differentiation (GO:0045580)             | 11/97  | STAT5A;CD2;IL1RL2;TESPA1;IRF4;LCK;HLX;IL2RA;CLPTM1;TNFSF9;IL7R                                                         | 6.56E-03 |
